# Supplementary material for: Phospholipids are A Potentially Important Source of Tissue Biomarkers for Hepatocellular Carcinoma: Results of a Pilot Study Involving Targeted Metabolomics
Source: MDPI journal article supplement (doi:10.3390/diagnostics9040167), 2019-10-29
Supplement: s1 [file s1]

# Supplementary Materials

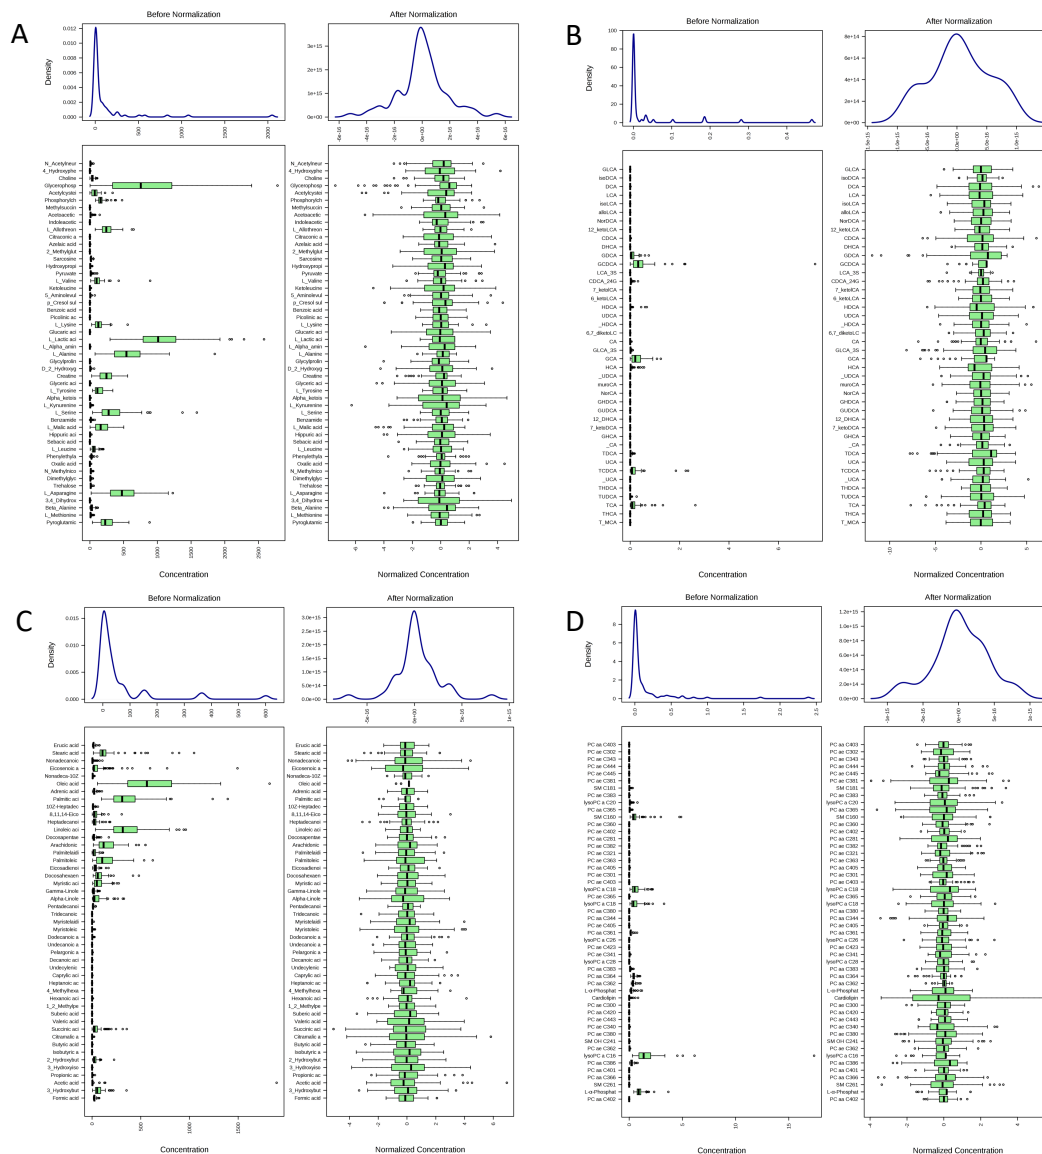

Supplementary Figure 1. Box plots and kernel density plots before and after normalization. The density plots are based on all samples. (A) Small molecules; (B) Bile acids; (C) Free fatty acids; (D) Lipids.

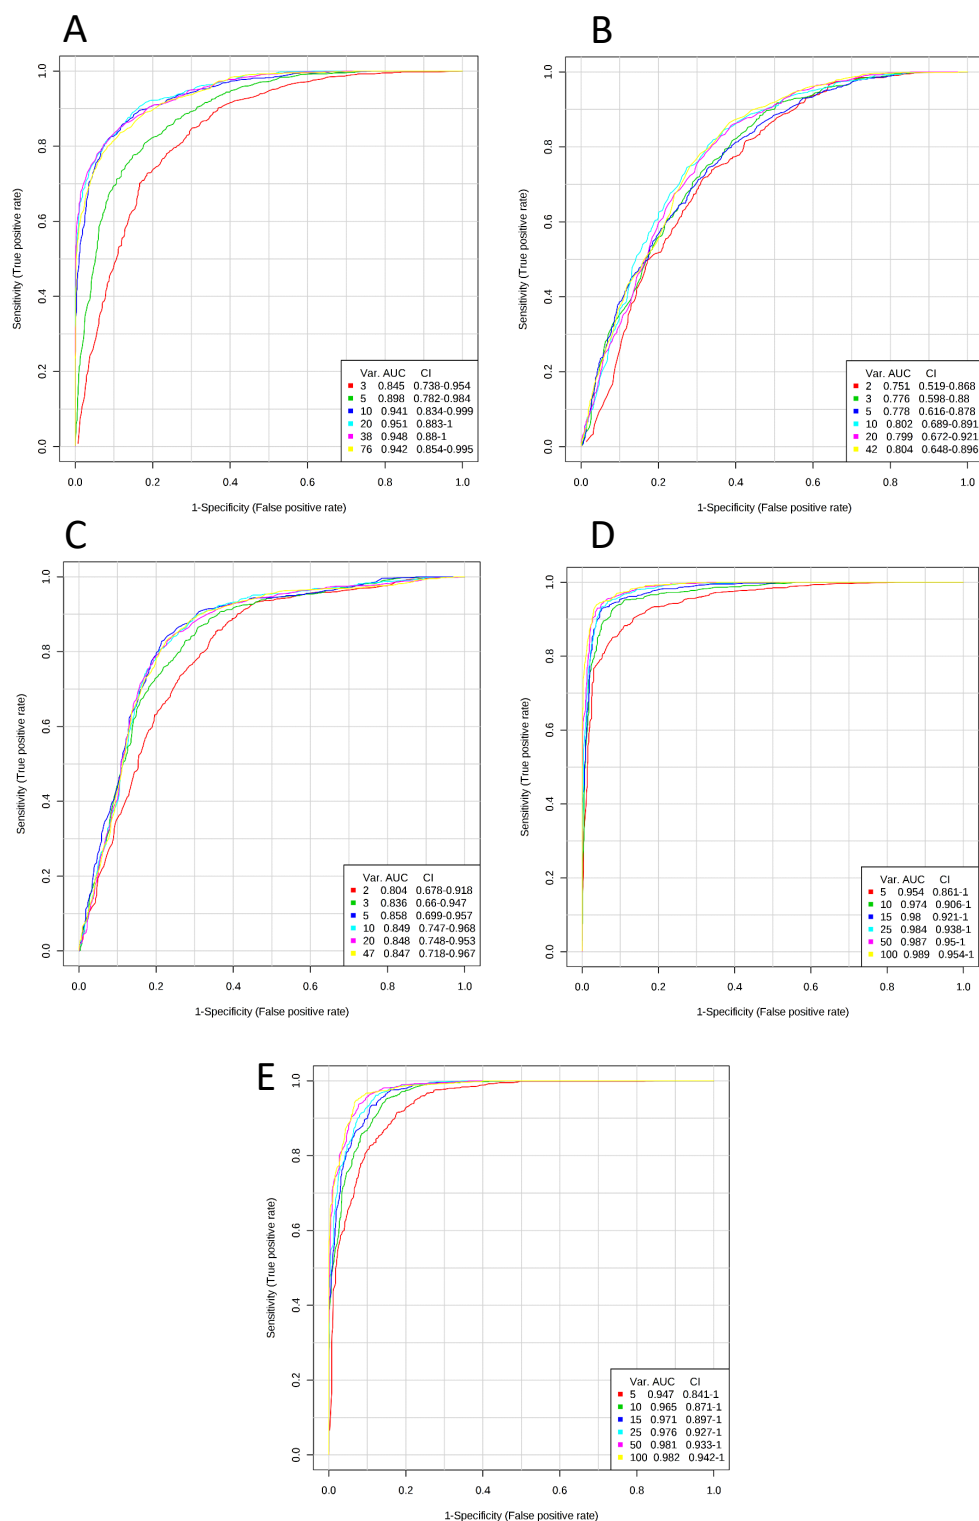

*Supplementary Figure 2.* ROC curves for random forests signatures based on the different metabolite classes. Plots reflect average performance across all Monte Carlo cross validation runs. (A) Small molecules; (B) Bile acids; (C) Free fatty acids; (D) Lipids; (E) All metabolites. All 95% confidence intervals (CIs) were computed. The signature size corresponding to each curve is shown under the “Var” heading in the key for each plot.

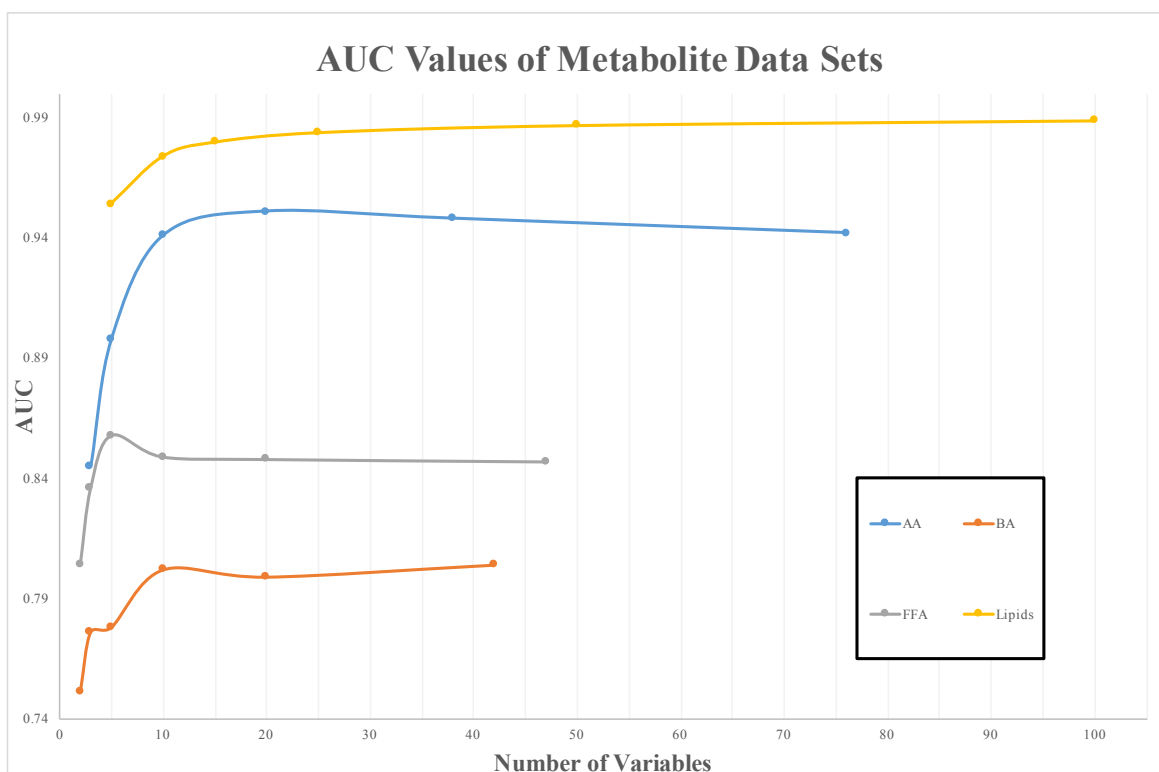

Supplementary Figure 3. AUC values for random forest based signatures of all four metabolite classes.

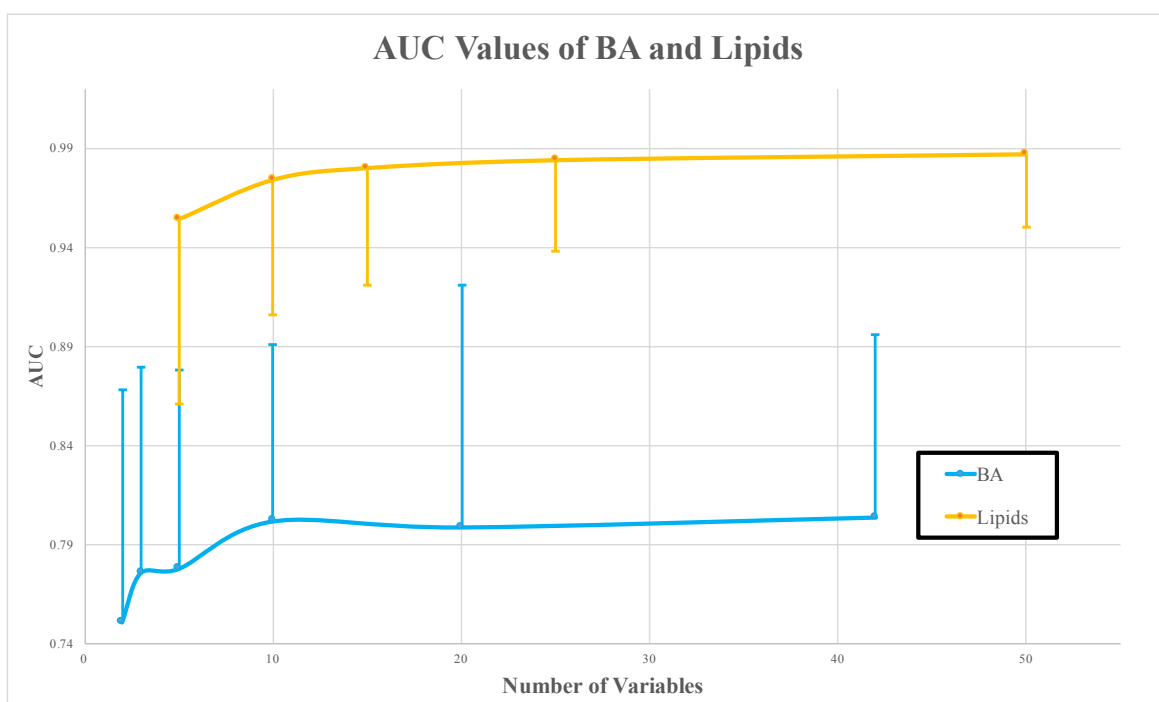

Supplementary Figure 4. AUC values for random forests based signatures for BA and lipids metabolite classes. Horizontal bars represent 95% confidence intervals for AUC.

Supplementary Table 1: Differences in AUC values for random forests-derived metabolomic signatures of varying number of metabolite variables in the signature.

| Metabolite class | Number of Variables | Area Under Curve (AUC) | Lower bound 95% CI | Upper bound 95% CI |
|------------------|---------------------|------------------------|--------------------|--------------------|
| Small molecules  | 3                   | 0.845                  | 0.738              | 0.954              |
|                  | 5                   | 0.898                  | 0.782              | 0.984              |
|                  | 10                  | 0.941                  | 0.834              | 0.999              |
|                  | 20                  | 0.951                  | 0.883              | 1                  |
|                  | 38                  | 0.948                  | 0.880              | 1                  |
| Bile acids       | 2                   | 0.751                  | 0.519              | 0.868              |
|                  | 3                   | 0.776                  | 0.598              | 0.880              |
|                  | 5                   | 0.778                  | 0.616              | 0.878              |
|                  | 10                  | 0.802                  | 0.689              | 0.891              |
|                  | 20                  | 0.799                  | 0.672              | 0.921              |
|                  | 42                  | 0.804                  | 0.648              | 0.896              |
| Free fatty acids | 2                   | 0.804                  | 0.678              | 0.918              |
|                  | 3                   | 0.836                  | 0.660              | 0.947              |
|                  | 5                   | 0.858                  | 0.699              | 0.957              |
|                  | 10                  | 0.849                  | 0.747              | 0.968              |
|                  | 20                  | 0.848                  | 0.748              | 0.953              |
|                  | 47                  | 0.847                  | 0.718              | 0.967              |
| Phospholipids    | 5                   | 0.954                  | 0.861              | 1                  |
|                  | 10                  | 0.974                  | 0.906              | 1                  |
|                  | 15                  | 0.980                  | 0.921              | 1                  |
|                  | 25                  | 0.984                  | 0.938              | 1                  |
|                  | 50                  | 0.987                  | 0.950              | 1                  |

Supplementary Table 2: Compounds comprising the random forests-derived 10-metabolites for 4 different metabolic classes (small molecules, free fatty acids, bile acids, and phospholipids). Fold change, false discovery rate (FDR), along with univariate p-value and area under the receiver operating characteristic curve (AUC) are shown for each metabolite univariate.

| <u>Small molecules</u>  |                             |             |       |          |          |
|-------------------------|-----------------------------|-------------|-------|----------|----------|
| Rank                    | Metabolite                  | Fold Change | AUC   | p-value  | FDR      |
| 1                       | Malic acid                  | 0.478       | 0.834 | 3.27E-08 | 2.48E-06 |
| 2                       | Maleic acid                 | 0.487       | 0.789 | 3.46E-07 | 1.31E-05 |
| 3                       | D-2-Hydroxyglutaric acid    | 2.27        | 0.721 | 1.30E-03 | 7.60E-03 |
| 4                       | Pyruvic acid                | 2.131       | 0.755 | 3.75E-06 | 7.13E-05 |
| 5                       | Creatine                    | 0.644       | 0.771 | 9.07E-07 | 2.30E-05 |
| 6                       | Dimethylglycine             | 0.63        | 0.74  | 1.59E-05 | 2.41E-04 |
| 7                       | L-Histidine                 | 1.464       | 0.68  | 7.87E-04 | 5.98E-03 |
| 8                       | L-alpha-aminobutyric acid   | 0.652       | 0.692 | 2.22E-03 | 9.92E-03 |
| 9                       | L-Tryptophan                | 1.839       | 0.728 | 5.18E-05 | 6.56E-04 |
| 10                      | Glycerophosphocholine       | 0.764       | 0.696 | 1.00E-03 | 7.10E-03 |
| <u>Free fatty acids</u> |                             |             |       |          |          |
| Rank                    | Metabolite                  | Fold Change | AUC   | p-value  | FDR      |
| 1                       | a-Linolenic acid            | 0.363       | 0.783 | 2.83E-07 | 1.33E-05 |
| 2                       | 8,11,14-Eicosatrienoic acid | 1.853       | 0.736 | 2.47E-05 | 3.61E-04 |
| 3                       | Palmitelaidic acid          | 1.749       | 0.738 | 1.84E-05 | 3.61E-04 |
| 4                       | 10Z-Heptadecenoic acid      | 1.395       | 0.689 | 1.02E-03 | 9.56E-03 |
| 5                       | Butyric acid                | 1.79        | 0.72  | 3.07E-05 | 3.61E-04 |
| 6                       | Linoleic acid               | 0.886       | 0.633 | 1.18E-01 | 2.63E-01 |
| 7                       | 10Z-Nonadecenoic acid       | 1.188       | 0.629 | 4.91E-02 | 1.77E-01 |
| 8                       | Myristoleic acid            | 2.462       | 0.61  | 6.89E-02 | 1.90E-01 |
| 9                       | Propionic acid              | 0.619       | 0.682 | 2.95E-03 | 2.31E-02 |
| 10                      | gamma-Linolenic acid        | 0.886       | 0.552 | 1.18E-01 | 2.63E-01 |
| <u>Bile acids</u>       |                             |             |       |          |          |
| Rank                    | Metabolite                  | Fold Change | AUC   | p-value  | FDR      |
| 1                       | Glycholic acid              | 0.627       | 0.735 | 1.67E-05 | 6.16E-04 |
| 2                       | Chenodeoxycholic acid       | 4.57        | 0.752 | 2.93E-05 | 6.16E-04 |
| 3                       | Taurocholic acid            | 0.86        | 0.554 | 1.35E-02 | 1.03E-01 |
| 4                       | Cholic acid                 | 3.057       | 0.631 | 2.44E-02 | 1.03E-01 |
| 5                       | Taurodeoxycholic acid       | 0.587       | 0.681 | 2.32E-03 | 3.25E-02 |
| 6                       | Hyodeoxycholic acid         | 3.7         | 0.615 | 2.18E-02 | 1.03E-01 |
| 7                       | Hyochoic acid               | 2.889       | 0.62  | 1.55E-02 | 1.03E-01 |
| 8                       | T-muricholic acid           | 1.057       | 0.543 | 3.98E-01 | 7.36E-01 |
| 9                       | Lithocholic acid -3sulfate  | 1.176       | 0.614 | 2.02E-02 | 1.03E-01 |
| 10                      | Glycodeoxycholic acid       | 0.628       | 0.663 | 3.40E-03 | 3.57E-02 |

| <u>Phospholipids</u> |             |             |       |          |          |
|----------------------|-------------|-------------|-------|----------|----------|
| Rank                 | Metabolite  | Fold Change | AUC   | p-value  | FDR      |
| 1                    | PC aa C38:6 | 0.473       | 0.918 | 1.37E-13 | 1.46E-11 |
| 2                    | PC ae C34:0 | 3.037       | 0.873 | 5.43E-12 | 2.90E-10 |
| 3                    | PC aa C42:2 | 1.386       | 0.818 | 4.78E-06 | 2.56E-05 |
| 4                    | PC ae C40:6 | 0.606       | 0.809 | 2.32E-08 | 4.96E-07 |
| 5                    | PC aa C34:3 | 0.687       | 0.741 | 8.23E-06 | 4.19E-05 |
| 6                    | PC aa C28:1 | 0.645       | 0.756 | 1.08E-06 | 8.51E-06 |
| 7                    | PC aa C32:1 | 1.947       | 0.763 | 9.25E-08 | 1.41E-06 |
| 8                    | PC ae C36:2 | 0.899       | 0.79  | 3.21E-04 | 1.11E-03 |
| 9                    | PC ae C44:6 | 0.807       | 0.709 | 1.77E-03 | 4.20E-03 |
| 10                   | PC aa C38:5 | 0.857       | 0.836 | 1.17E-02 | 2.40E-02 |

---
